# Supplementary material
Source: PubMed Central journal article supplement (PMC2923913)
Supplement: pp.110.157461_1.pdf [file pp.110.157461_1.pdf]

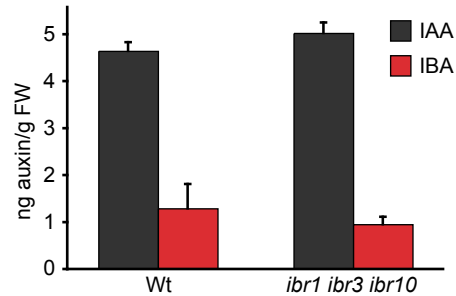

**Supplemental Figure 1.** Auxin levels in whole *ibr1 ibr3 ibr10* seedlings resemble those in wild type.

Mean IAA and IBA levels (+ SE) in 5-d-old Col-0 (Wt) and *ibr1-2 ibr3-1 ibr10-1* seedlings, measured by GC-MS with selective ion monitoring ( $n \geq 6$ ).

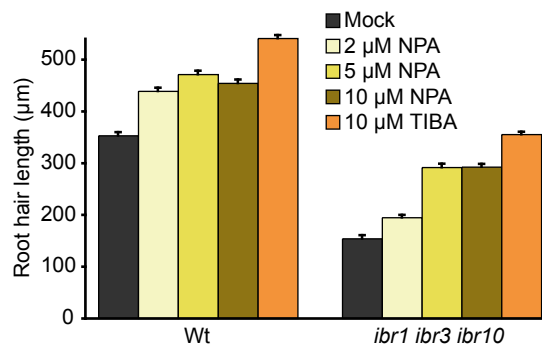

**Supplemental Figure 2.** Auxin transport inhibitors only partially restore root hair elongation to *ibr1 ibr3 ibr10*.

Mean root hair lengths (+ SE) of 5-d-old Col-0 (Wt) and *ibr1-2 ibr3-1 ibr10-1* seedlings vertically grown on medium supplemented with ethanol (mock), 2 μM NPA, 5 μM NPA, 10 μM NPA, or 10 μM TIBA. Root hair lengths were measured using NIH Image software ( $n = 500$  total root hairs from at least 14 seedlings).
